# Supplementary material for: #Stayathome If You Have a Cold: High SARS-CoV-2 Salivary Viral Loads in Pediatric Patients with Nasopharyngeal Symptoms
Source: MDPI journal article supplement (doi:10.3390/v15010081), 2022-12-28
Supplement: s1 [file s1]

**Supplementary Table S1.** Clinical data, Ct value from RT-PCR of NPS, and SVL by ddPCR of the enrolled subjects.

| Patient # | Gender | Age       | Symptoms  | Days since symptoms onset | Ct value from RT-PCR of NPS | SVL by ddPCR (copies/ml) |
|-----------|--------|-----------|-----------|---------------------------|-----------------------------|--------------------------|
| 1         | Male   | 1 month   | None      | -                         | 33                          | 0                        |
| 2         | Male   | 1 month   | 2,8       | 6                         | 30                          | 0                        |
| 3         | Male   | 2 years   | None      | -                         | 42                          | 0                        |
| 4         | Male   | 13 years  | 1,4,7     | 3                         | 36                          | 0                        |
| 5         | Female | 8 years   | 1,10      | 2                         | 39                          | 0                        |
| 6         | Female | 5 years   | 1,5,10    | 1                         | 39                          | 0                        |
| 7         | Female | 5 years   | 1,4,10,11 | 2                         | 37.6                        | 0                        |
| 8         | Female | 5 years   | 1,5       | 3                         | 33                          | 0                        |
| 9         | Male   | 6 months  | 1,4       | 2                         | -                           | 0                        |
| 10        | Female | 10 years  | None      | -                         | -                           | 0                        |
| 11        | Female | 6 years   | 1,3,8     | 3                         | 13                          | 0                        |
| 12        | Female | 7 years   | None      | -                         | 39                          | 0                        |
| 13        | Female | 8 years   | 1,7       | 2                         | 30                          | 0                        |
| 14        | Female | 6 years   | 7         | 1                         | -                           | 0                        |
| 15        | Male   | 2 years   | 1,2,3,4   | 2                         | 20                          | 0                        |
| 16        | Male   | 2 years   | 1,2       | 2                         | 40                          | 0                        |
| 17        | Female | 1 month   | 1,10      | 1                         | 21                          | 500                      |
| 18        | Male   | 16 years  | 4,5       | 2                         | -                           | 560                      |
| 19        | Male   | 13 years  | None      | -                         | 28                          | 2730                     |
| 20        | Female | 14 years  | None      | -                         | 31                          | 4450                     |
| 21        | Male   | 10 years  | 1,3,8     | 2                         | 18                          | 4500                     |
| 22        | Female | 16 years  | None      | -                         | 30                          | 6975                     |
| 23        | Male   | 15 days   | 1         | 1                         | -                           | 17450                    |
| 24        | Female | 9 years   | None      | -                         | 29                          | 25300                    |
| 25        | Male   | 9 years   | 1,2       | 2                         | 30                          | 35500                    |
| 26        | Female | 15 years  | 1,2       | 2                         | 40                          | 41000                    |
| 27        | Male   | 14 years  | 5         | 1                         | 29                          | 44400                    |
| 28        | Female | 10 months | 1,4,5     | 1                         | 13                          | 104800                   |
| 29        | Male   | 1 month   | 1,4       | 2                         | 13                          | 199000                   |
| 30        | Male   | 13 years  | 1,2,3     | 9                         | 30                          | 778000                   |
| 31        | Female | 11 months | 1,8       | 1                         | 10                          | 829000                   |
| 32        | Male   | 11 years  | 8         | 1                         | 11                          | 2034000                  |
| 33        | Male   | 2 years   | 1,5       | 2                         | 21                          | 16945000                 |
| 34        | Female | 13 years  | 1,3,8     | 2                         | 17                          | 287725000                |
| 35        | Female | 15 years  | 1,8       | 1                         | 12                          | 344000000                |

**Symptoms:** 1. Fever; 2. Dyspnea; 3. Cough; 4. Diarrhoea/abdominal pain; 5. Vomiting; 6. Asthenia; 7. Headache; 8. Rhinitis/pharyngodynia; 9. Ageusia/anosmia; 10. Exanthema; 11. Conjunctivitis
